# Supplementary material for: Gut Microbiota Mediates Dietary Modulation of Mild Cognitive Impairment in the Elderly: A Cross-Sectional Study
Source: Research Square preprint supplement (doi:10.21203/rs.3.rs-7011889/v1), 2025-07-27
Supplement: Supplementary file 1 [file 697d55343e02753d0afd06dc.pdf]

## Tables

Table s. Food grouping used in the dietary intake analysis

| Food groups                    | 117 items                                                                                                                                                                                                                                                                                                                                 |
|--------------------------------|-------------------------------------------------------------------------------------------------------------------------------------------------------------------------------------------------------------------------------------------------------------------------------------------------------------------------------------------|
| rice and whole grain           | cooked rice,cooked rice with other grains,rice gruel,steamed stuffed bun,steamed bread,sesame paste,oatmeal,noodle,dumplings,pancake                                                                                                                                                                                                      |
| Legume and legume product      | soybean,bean curd,tofu pudding,soybean milk,mung,peas,other dried beans and products                                                                                                                                                                                                                                                      |
| snacks                         | chocolate,biscuit,candy, potato chips,beef jerky,hawthorn roll, bread,hamburg,walnut cake,other snacks                                                                                                                                                                                                                                    |
| milk and dairy products        | fresh milk,milk powder,soymilk,cream,yogurt                                                                                                                                                                                                                                                                                               |
| eggs                           | quail egg,(hen's) egg,duck's egg,preserved egg,other eggs                                                                                                                                                                                                                                                                                 |
| alcohol                        | spirit,red wine,beer,other alcohol                                                                                                                                                                                                                                                                                                        |
| meats and poultry              | pork,pork chops,pork liver,beef,mutton,chicken,duck and goose,dove,other meat and products                                                                                                                                                                                                                                                |
| fish and marine lives          | freshwater fish,mud fish,eel,shrim and crab,other marine products                                                                                                                                                                                                                                                                         |
| fruits                         | orange,watermelon,pineapple,apple,longan,pear,grape,banana,pitaya,peach,kiwi fruit,other fruits                                                                                                                                                                                                                                           |
| Nuts and seeds                 | Preserved fruit,raisin,jujube,walnut,peanuts,Chinese chestnut,almond,pine nut,dried persimmon,pumpkin seed,sunflower seeds                                                                                                                                                                                                                |
| Fungi and seaweeds             | needle mushroom,shii-take,dried mushrooms,laver,kelp,agaric                                                                                                                                                                                                                                                                               |
| vegetables                     | Spinach, cauliflower, Chinese cabbage and lettuce,garlic,edible amaranth,lettuce,pakchoi,rape,fragrant-flowered garlic, coriander,celery,cabbage,garlic sprout,Bean sprout,potato, lotus root,bolt,Chinese watermelon,chayote,cucumber,pumpkin,luffa,summer squash,tomato,pepper,eggplant,long bean,edamame,carrot,mooli,other vegetables |
| starch and tuber crops product | Vermicelli,bean jelly,honey,Semen sesami nigrum,other products                                                                                                                                                                                                                                                                            |
| pickles                        | root-mustard,cucumber preserved with soy paste,preserved szechuan pickle,dried turnip,Other pickles                                                                                                                                                                                                                                       |
| tea and beverages              | Tea,coke,fruit juice,other beverages                                                                                                                                                                                                                                                                                                      |
